# Supplementary material
Source: PubMed Central journal article supplement (PMC9533186)
Supplement: jama-e2217034-s003.pdf [file jama-e2217034-s003.pdf]

## Supplemental Online Content

Kaye KS, Belley A, Barth P, et al. Effect of cefepime/enmetazobactam vs piperacillin/tazobactam on clinical cure and microbiological eradication in patients with complicated urinary tract infection or acute pyelonephritis: a randomized clinical trial. *JAMA*. doi:10.1001/jama.2022.17034

**eTable 1.** Study Populations Analyzed in the Phase 3 Study

**eTable 2.** Description of Clinical and Microbiological Outcomes Used in the Phase 3 Study

**eTable 3.** Listing of All Secondary Outcomes Assessed in the Phase 3 Study Not Presented in This Report

**eTable 4.** Demographic and Baseline Characteristics of Patients in the Primary Analysis Set

**eTable 5.** Overall Success, Clinical Cure and Microbiological Eradication in Patients Without Exclusion Based on Susceptibility

**eTable 6.** Overview of Adverse Events in All Patients Receiving at Least One Dose of Study Drug

**eTable 7.** Listing of Adverse Events Leading to Discontinuation of Study Drug in All Patients Receiving at Least One Dose of Study Drug

**eBox.** Exclusion and Inclusion criteria Used Among 1107 Patients Assessed for Study Eligibility

This supplemental material has been provided by the authors to give readers additional information about their work.

**eTable 1. Study Populations Analyzed in the Phase 3 Study**

| Name of study population in study protocol and statistical analysis plan | Study population presented in this report                 | Criteria for study population                                                                                                                                                                                                                                                                                                                                                                                                                                                                                                                                                                                                                                                                                                                                                                                                                                                                                                                                                                                                                                                                                                                                                                            |
|--------------------------------------------------------------------------|-----------------------------------------------------------|----------------------------------------------------------------------------------------------------------------------------------------------------------------------------------------------------------------------------------------------------------------------------------------------------------------------------------------------------------------------------------------------------------------------------------------------------------------------------------------------------------------------------------------------------------------------------------------------------------------------------------------------------------------------------------------------------------------------------------------------------------------------------------------------------------------------------------------------------------------------------------------------------------------------------------------------------------------------------------------------------------------------------------------------------------------------------------------------------------------------------------------------------------------------------------------------------------|
| Intent to Treat (ITT)                                                    | Not presented in this report                              | All randomized patients                                                                                                                                                                                                                                                                                                                                                                                                                                                                                                                                                                                                                                                                                                                                                                                                                                                                                                                                                                                                                                                                                                                                                                                  |
| Modified Intent to Treat (MITT)                                          | All patients who received at least one dose of study drug | All patients who were randomized and received at least one dose of study drug. All adverse event analyses were based on actual treatment received.                                                                                                                                                                                                                                                                                                                                                                                                                                                                                                                                                                                                                                                                                                                                                                                                                                                                                                                                                                                                                                                       |
| Microbiological-Modified Intent to Treat (m-MITT)                        | Primary analysis set                                      | The primary analysis set included all randomized patients who received at least one dose of study drug and who had a baseline gram-negative pathogen $\geq 10^5$ CFU/ml in urine culture or the same pathogen present in concurrent blood and urine cultures that caused the complicated UTI that was not resistant to cefepime/enmetazobactam (minimum inhibitory concentration $\leq 8$ $\mu$ g/ml; minimum inhibitory concentration determined with enmetazobactam at a fixed concentration of 8 $\mu$ g/ml) or piperacillin/tazobactam (minimum inhibitory concentration $\leq 64$ $\mu$ g/ml). If $\geq 3$ bacterial isolates were identified, the culture was considered contaminated regardless of colony count unless one of the isolates that grew in the urine, even if $\geq 10^5$ CFU/ml, was also isolated from a blood culture obtained within 48 hours prior to randomization. Any patient with only a gram-positive pathogen or a bacterial species typically not expected to respond to both study drugs at $\geq 10^5$ CFU/ml, was excluded from the primary analysis set. Patients with contaminated screening and baseline samples were also excluded from the primary analysis set. |
| Microbiological-Modified Intent to Treat + Resistant (m-MITT+R)          | Patients without exclusion based on susceptibility        | All randomized patients who met criteria for the primary analysis set including patients with isolates resistant to cefepime/enmetazobactam (minimum inhibitory concentration $> 8$ $\mu$ g/ml; minimum inhibitory concentration determined with enmetazobactam at a fixed concentration of 8 $\mu$ g/ml) or piperacillin/tazobactam (minimum inhibitory concentration $> 64$ $\mu$ g/ml), or with a missing minimum inhibitory concentration determination (i.e. minimum inhibitory concentration unknown).                                                                                                                                                                                                                                                                                                                                                                                                                                                                                                                                                                                                                                                                                             |
| Clinically Evaluable (CE)                                                | Not presented in this report                              | The clinically evaluable population included all patients who received at least one dose of study drug and who met the following important components of the study as specified in the protocol: <ul style="list-style-type: none"> <li>Received a total duration of antibacterial therapy of at least 15 consecutive doses of study drug or were classified as clinical failures after completing at least 9 doses of intravenous study drug therapy</li> </ul>                                                                                                                                                                                                                                                                                                                                                                                                                                                                                                                                                                                                                                                                                                                                         |

| Name of study population in study protocol and statistical analysis plan | Study population presented in this report | Criteria for study population                                                                                                                                                                                                                                                                                                                                                                                                                                                                                                        |
|--------------------------------------------------------------------------|-------------------------------------------|--------------------------------------------------------------------------------------------------------------------------------------------------------------------------------------------------------------------------------------------------------------------------------------------------------------------------------------------------------------------------------------------------------------------------------------------------------------------------------------------------------------------------------------|
|                                                                          |                                           | <ul style="list-style-type: none"> <li>• Had a clinical assessment at Day 14<sup>a</sup>, unless criteria for clinical failure were met at an earlier time point</li> <li>• Did not receive concomitant antibacterial therapy with a non-study antibacterial drug to which the uropathogen was susceptible between the time of the baseline culture and Day 14, unless criteria for clinical failure were met</li> <li>• Did not have any other major protocol violations that would have affected assessment of efficacy</li> </ul> |
| Microbiologically Evaluable (ME)                                         | Not presented in this report              | All patients who met the definition for both the primary analysis set and clinically evaluable population. In addition, patients must not have had a microbiological outcome of indeterminate at Day 14. Concomitant administration of narrow-spectrum gram-positive active agents to patients who had gram-positive and gram-negative co-infection did not affect patient evaluability in the clinically evaluable or microbiologically evaluable populations.                                                                      |
| Microbiologically Evaluable + Resistant (ME+R)                           | Not presented in this report              | All patients who met the definition for patients without exclusion based on susceptibility and the clinically evaluable population. In addition, patients must not have had a microbiological outcome of indeterminate at Day 14. Concomitant administration of narrow-spectrum gram-positive active agents to patients who had gram-positive and gram-negative co-infection did not affect patient evaluability in the clinically evaluable or microbiologically evaluable + resistant populations.                                 |

<sup>a</sup>Day 14 occurred 7 [±2] days after end of treatment (i.e. the test of cure visit).

**eTable 2. Description of Clinical and Microbiological Outcomes Used in the Phase 3 Study**

| Category                | Criteria                                                                                                                                                                                                                                                                                                                                                                                                                                                                                                                                                                                                                                                                                                                                                                                                                                                                                                                                                                                                                                                                                                                           |
|-------------------------|------------------------------------------------------------------------------------------------------------------------------------------------------------------------------------------------------------------------------------------------------------------------------------------------------------------------------------------------------------------------------------------------------------------------------------------------------------------------------------------------------------------------------------------------------------------------------------------------------------------------------------------------------------------------------------------------------------------------------------------------------------------------------------------------------------------------------------------------------------------------------------------------------------------------------------------------------------------------------------------------------------------------------------------------------------------------------------------------------------------------------------|
| Clinical outcome        |                                                                                                                                                                                                                                                                                                                                                                                                                                                                                                                                                                                                                                                                                                                                                                                                                                                                                                                                                                                                                                                                                                                                    |
| Cure                    | The complete resolution (or return to premorbid state) of the baseline signs and symptoms of complicated UTI or acute pyelonephritis that were present at screening (and no new urinary symptoms or worsening of symptoms), such that no further antimicrobial therapy to treat the of complicated UTI or acute pyelonephritis was warranted. Symptom resolution did not necessarily include baseline symptoms associated with anatomic abnormalities that predispose to cUTI, such as symptoms associated with the presence of an indwelling urinary catheter. <b>This outcome category could have been used at Day 3 of treatment, end of treatment, Day 14<sup>a</sup>, Day 21<sup>b</sup>, and early termination.</b>                                                                                                                                                                                                                                                                                                                                                                                                          |
| Improvement             | Lessening, incomplete resolution, or no worsening of baseline clinical signs and symptoms of complicated UTI or acute pyelonephritis, but continued intravenous therapy for management of complicated UTI or acute pyelonephritis was warranted. <b>This outcome category could only have been used at Day 3 of treatment.</b>                                                                                                                                                                                                                                                                                                                                                                                                                                                                                                                                                                                                                                                                                                                                                                                                     |
| Failure                 | <p>Patients who experienced any 1 of the following:</p> <ul style="list-style-type: none"> <li>• At Day 3 of treatment and end of treatment, worsening of baseline clinical signs and symptoms of complicated UTI or acute pyelonephritis or the development of new clinical signs and symptoms of infection, sufficient to stop study drug and initiate non-study antimicrobial;</li> <li>• At Day 14 and Day 21, persistence, incomplete resolution of baseline clinical signs and symptoms of infection, requiring additional antibiotic therapy;</li> <li>• Withdrawal from the study drug due to an adverse event or due to lack of clinical improvement; or</li> <li>• Death of the patient during the study.</li> </ul> <p>Note: Withdrawal from the study drug due to an adverse event or due to lack of clinical improvement or death of the patient during the study led to clinical failure for the subsequent time points but did not change the previous time point assessment. <b>This outcome category could have been used at Day 3 of treatment, end of treatment, Day 14, Day 21, and early termination.</b></p> |
| Indeterminate           | Clinical outcome could not be determined. <b>This outcome category could have been used at Day 3 of treatment, end of treatment, Day 14, Day 21, and early termination.</b>                                                                                                                                                                                                                                                                                                                                                                                                                                                                                                                                                                                                                                                                                                                                                                                                                                                                                                                                                        |
| Microbiological outcome |                                                                                                                                                                                                                                                                                                                                                                                                                                                                                                                                                                                                                                                                                                                                                                                                                                                                                                                                                                                                                                                                                                                                    |
| Eradication             | The baseline qualifying Gram-negative pathogen(s) was reduced to <10 <sup>3</sup> CFU/ml in urine culture; AND a negative blood culture for a Gram-negative pathogen that was identified as a uropathogen (if repeated after positive baseline blood culture).                                                                                                                                                                                                                                                                                                                                                                                                                                                                                                                                                                                                                                                                                                                                                                                                                                                                     |
| Persistence             | Demonstration that one or more of the baseline Gram-negative pathogen(s) remained continuously present in urine culture at ≥10 <sup>3</sup> CFU/ml; OR a continuously positive blood culture with an organism that was identified as a Gram-negative uropathogen.                                                                                                                                                                                                                                                                                                                                                                                                                                                                                                                                                                                                                                                                                                                                                                                                                                                                  |
| Recurrence              | Isolation of the same baseline Gram-negative pathogen(s) from urine culture after a response of eradication; OR a positive blood culture with the same baseline Gram-negative pathogen that was identified as a uropathogen after a response of eradication.                                                                                                                                                                                                                                                                                                                                                                                                                                                                                                                                                                                                                                                                                                                                                                                                                                                                       |
| Indeterminate           | No urine culture was available, or the culture could not be interpreted for any reason.                                                                                                                                                                                                                                                                                                                                                                                                                                                                                                                                                                                                                                                                                                                                                                                                                                                                                                                                                                                                                                            |

<sup>a</sup>Day 14 occurred 7 [±2] days after end of treatment (i.e. the test of cure visit).

<sup>b</sup>Day 21 occurred 14 [±2] days after end of treatment (i.e. the late follow-up visit).

**eTable 3. Listing of All Secondary Outcomes Assessed in the Phase 3 Study Not Presented in This Report**

|                                                                                                                                                                                                                                                                                                                                                                                                                                                           |
|-----------------------------------------------------------------------------------------------------------------------------------------------------------------------------------------------------------------------------------------------------------------------------------------------------------------------------------------------------------------------------------------------------------------------------------------------------------|
| The composite outcome for the clinically evaluable and microbiologically evaluable populations.                                                                                                                                                                                                                                                                                                                                                           |
| The composite outcome for the microbiologically evaluable + resistant population.                                                                                                                                                                                                                                                                                                                                                                         |
| The number and percentage of patients in the microbiologically evaluable, and microbiologically evaluable + resistant populations with composite outcomes (success, failure, or indeterminate) at day 3 of treatment, end of treatment and at Day 21 <sup>a</sup> will be summarized by treatment group.                                                                                                                                                  |
| The number and percentage of patients in the microbiologically evaluable, and microbiologically evaluable + resistant populations with clinical outcomes (cure, improvement, failure, and indeterminate) at day 3 of treatment, end of treatment, at Day 14 <sup>b</sup> , and at Day 21 will be summarized by treatment group.                                                                                                                           |
| The number and percentage of patients in the microbiologically evaluable, and microbiologically evaluable + resistant populations with per-patient microbiological outcomes (eradication, persistence, recurrence, and indeterminate) at day 3 of treatment, end of treatment, at Day 14, and at Day 21 will be summarized by treatment group.                                                                                                            |
| The per-pathogen microbiological outcomes (eradication, persistence, recurrence, and indeterminate) at day 3 of treatment, end of treatment, at Day 14, and at Day 21 by baseline pathogen will be summarized by treatment group in the primary analysis set, patients without exclusion based on susceptibility results, microbiologically evaluable, and microbiologically evaluable + resistant populations.                                           |
| Clinical cure rates at day 3 of treatment, end of treatment, at Day 14, and at Day 21 by baseline pathogen will be summarized in the primary analysis set, patients without exclusion based on susceptibility results, microbiologically evaluable, and microbiologically evaluable + resistant populations as the proportion of patients with a clinical cure for each baseline pathogen isolated.                                                       |
| Clinical outcomes at day 3 of treatment, end of treatment, at Day 14, and at Day 21 will be summarized for the subset of patients infected with baseline extended spectrum $\beta$ -lactamase-producing isolates of Enterobacterales in the primary analysis set, patients without exclusion based on susceptibility results, microbiologically evaluable, and microbiologically evaluable + resistant populations.                                       |
| Per-patient microbiological outcomes at day 3 of treatment, end of treatment, at Day 14, and at Day 21 will be summarized for the subset of patients infected with baseline extended spectrum $\beta$ -lactamase-producing isolates of Enterobacterales in the primary analysis set, patients without exclusion based on susceptibility results, microbiologically evaluable, and microbiologically evaluable + resistant populations.                    |
| Composite outcomes (success, failure, or indeterminate) at day 3 of treatment, end of treatment, at Day 14, and at Day 21 will be summarized for the subset of patients infected with baseline extended spectrum $\beta$ -lactamase-producing isolates of Enterobacterales in the primary analysis set, patients without exclusion based on susceptibility results, microbiologically evaluable, and microbiologically evaluable + resistant populations. |
| Clinical cure at Day 14 will be summarized for discrete minimum inhibitory concentration values in the primary analysis set, patients without exclusion based on susceptibility results, microbiologically evaluable, and microbiologically evaluable + resistant.                                                                                                                                                                                        |
| Per-patient microbiological Eradication at Day 14 will be summarized for discrete cefepime/enmetazobactam and piperacillin/tazobactam baseline minimum inhibitory concentration values by baseline pathogen in the primary analysis set, patients without exclusion based on susceptibility results, microbiologically evaluable, and microbiologically evaluable + resistant populations.                                                                |
| Composite outcomes at Day 14 will be summarized for discrete cefepime/enmetazobactam and piperacillin/tazobactam baseline minimum inhibitory concentration values by baseline pathogen in the primary analysis set, patients without exclusion based on susceptibility results, microbiologically evaluable, and microbiologically evaluable + resistant populations.                                                                                     |

<sup>a</sup>Day 21 occurred 14 [±2] days after end of treatment (i.e. the late follow-up visit).

<sup>b</sup>Day 14 occurred 7 [±2] days after end of treatment (i.e. the test of cure visit).

**eTable 4. Demographic and Baseline Characteristics of Patients in the Primary Analysis Set**

| Demographic/Characteristic Category/Statistic                                      | Cefepime/enmetazobactam (N=345) | Piperacillin/tazobactam (N=333) |
|------------------------------------------------------------------------------------|---------------------------------|---------------------------------|
| Age in years, mean (SD)                                                            | 55.4 (18.7)                     | 52.4 (19.7)                     |
| Age group, n (%)                                                                   |                                 |                                 |
| <65 years                                                                          | 209 (60.6)                      | 220 (66.1)                      |
| 65 to <75 years                                                                    | 85 (24.6)                       | 70 (21.0)                       |
| ≥75 years                                                                          | 51 (14.8)                       | 43 (12.9)                       |
| Sex                                                                                |                                 |                                 |
| Male                                                                               | 144 (41.7)                      | 127 (38.1)                      |
| Female                                                                             | 201 (58.3)                      | 206 (61.9)                      |
| Race, n (%)                                                                        |                                 |                                 |
| Asian                                                                              | 3 (0.9)                         | 1 (0.3)                         |
| Black                                                                              | 1 (0.3)                         | 0 (0.0)                         |
| White                                                                              | 327 (94.8)                      | 316 (94.9)                      |
| Other <sup>a</sup>                                                                 | 14 (4.1)                        | 16 (4.8)                        |
| Weight in kg, mean (SD) [n]                                                        | 75.7 (16.9) [344]               | 74.3 (17.6) [333]               |
| Height in cm, mean (SD) [n]                                                        | 168.2 (9.6) [345]               | 167.9 (9.0) [333]               |
| BMI (kg/m <sup>2</sup> ), mean (SD) [n]                                            | 26.7 (5.6) [344]                | 26.3 (5.5) [333]                |
| eGFR at baseline (ml/min/1.73 m <sup>2</sup> ), mean (SD) [n]                      | 71.3 (22.3) [331]               | 71.5 (24.6) [312]               |
| eGFR group at baseline, n (%)                                                      |                                 |                                 |
| Severe: <30 ml/min/1.73 m <sup>2</sup>                                             | 2 (0.6)                         | 5 (1.5)                         |
| Moderate: 30-59 ml/min/1.73 m <sup>2</sup>                                         | 79 (22.9)                       | 75 (22.5)                       |
| Mild: 60-89 ml/min/1.73 m <sup>2</sup>                                             | 187 (54.2)                      | 166 (49.8)                      |
| Normal: ≥90 ml/min/1.73 m <sup>2</sup>                                             | 63 (18.3)                       | 66 (19.8)                       |
| Type of infection, n (%)                                                           |                                 |                                 |
| Acute pyelonephritis                                                               | 171 (49.6)                      | 178 (53.5)                      |
| Complicated UTI with removable source of infection                                 | 75 (21.7)                       | 73 (21.9)                       |
| Complicated UTI without removable source of infection but with other risk factors  | 99 (28.7)                       | 82 (24.6)                       |
| Prior antibiotic therapy, n (%)                                                    |                                 |                                 |
| Short-acting antibiotic up to 24 hours                                             | 25 (7.2)                        | 23 (6.9)                        |
| No prior antibiotic therapy                                                        | 320 (92.8)                      | 310 (93.1)                      |
| Region, n (%)                                                                      |                                 |                                 |
| Eastern Europe                                                                     | 238 (69.0)                      | 240 (72.1)                      |
| Americas                                                                           | 21 (6.1)                        | 22 (6.6)                        |
| Other countries                                                                    | 85 (24.6)                       | 71 (21.3)                       |
| Country category, n (%)                                                            |                                 |                                 |
| US                                                                                 | 1 (0.3)                         | 0 (0.0)                         |
| Non-US                                                                             | 344 (99.7)                      | 333 (100.0)                     |
| Charlson Comorbidity Index at baseline, n (%)                                      |                                 |                                 |
| <3                                                                                 | 198 (57.4)                      | 205 (61.6)                      |
| ≥3                                                                                 | 145 (42.0)                      | 125 (37.5)                      |
| Presence of concurrent bacteremia at baseline, n (%)                               | 38 (11.0)                       | 28 (8.4)                        |
| Diabetes at baseline, n (%)                                                        | 55 (15.9)                       | 41 (12.3)                       |
| Enterobacterales baseline pathogen, extended spectrum β-lactamase-producing, n (%) | 76 (22.0)                       | 66 (19.8)                       |
| Baseline pathogen, 5 most common                                                   |                                 |                                 |
| <i>Escherichia coli</i>                                                            | 264 (76.5)                      | 254 (76.3)                      |
| <i>Klebsiella pneumoniae</i>                                                       | 34 (9.9)                        | 32 (9.6)                        |
| <i>Proteus mirabilis</i>                                                           | 19 (5.5)                        | 19 (5.7)                        |
| <i>Pseudomonas aeruginosa</i>                                                      | 13 (3.8)                        | 11 (3.3)                        |
| <i>Enterobacter cloacae</i>                                                        | 7 (2.0)                         | 3 (0.9)                         |

Abbreviations: eGFR, estimated glomerular filtration rate; SD, standard deviation

<sup>a</sup>Other includes unknown or was not identified.

**eTable 5. Overall Success, Clinical Cure and Microbiological Eradication in Patients Without Exclusion Based on Susceptibility**

| Response at visit            | Cefepime/<br>enmetazobactam<br>(N=388)<br>n (%) | Piperacillin/<br>tazobactam<br>(N=383)<br>n (%) | Treatment<br>difference <sup>a</sup><br>% (95% CI) |
|------------------------------|-------------------------------------------------|-------------------------------------------------|----------------------------------------------------|
| Day 3 of treatment           |                                                 |                                                 |                                                    |
| Overall success <sup>b</sup> | 352 (90.7)                                      | 331 (86.4)                                      | 4.2 (-0.5, 8.8)                                    |
| Clinical cure                | 19 (4.9)                                        | 19 (5.0)                                        | 0.0 (-3.2, 3.3)                                    |
| Improvement <sup>c</sup>     | 357 (92.0)                                      | 347 (90.6)                                      | not determined                                     |
| Microbiological eradication  | 357 (92.0)                                      | 338 (88.3)                                      | 3.6 (-0.8, 8.0)                                    |
| End of therapy               |                                                 |                                                 |                                                    |
| Overall success              | 354 (91.2)                                      | 357 (93.2)                                      | -2.1 (-6.0, 1.8)                                   |
| Clinical cure                | 362 (93.3)                                      | 362 (94.5)                                      | -1.3 (-4.9, 2.2)                                   |
| Microbiological eradication  | 371 (95.6)                                      | 369 (96.3)                                      | -0.9 (-3.9, 2.1)                                   |
| Day 14 <sup>d</sup>          |                                                 |                                                 |                                                    |
| Overall success              | 305 (78.6)                                      | 225 (58.7)                                      | 20.7 (14.1, 27.0)                                  |
| Clinical cure                | 356 (91.8)                                      | 340 (88.8)                                      | 3.1 (-1.2, 7.4)                                    |
| Microbiological eradication  | 321 (82.7)                                      | 247 (64.5)                                      | 19.0 (12.8, 25.0)                                  |
| Day 21 <sup>e</sup>          |                                                 |                                                 |                                                    |
| Overall success              | 265 (68.3)                                      | 226 (59.0)                                      | 10.3 (3.5, 17.0)                                   |
| Clinical cure                | 334 (86.1)                                      | 324 (84.6)                                      | 1.5 (-3.6, 6.6)                                    |
| Microbiological eradication  | 291 (75.0)                                      | 252 (65.8)                                      | 10.0 (3.6, 16.4)                                   |

<sup>a</sup>Treatment difference was determined using the stratified Newcombe method.

<sup>b</sup>Overall success was determined as a composite outcome of clinical cure (complete resolution of the baseline signs and symptoms present at screening) and microbiological eradication (<10<sup>3</sup> CFU/ml of qualifying baseline pathogen in urine).

<sup>c</sup>Improvement was defined as lessening, incomplete resolution, or no worsening of baseline clinical signs and symptoms, but continued intravenous therapy was warranted. This outcome category was only used at Day 3 of treatment.

<sup>d</sup>Day 14 occurred 7 [±2] days after end of treatment (i.e. the test of cure visit).

<sup>e</sup>Day 21 occurred 14 [±2] days after end of treatment (i.e. the late follow-up visit).

**eTable 6. Overview of Adverse Events in All Patients Receiving at Least One Dose of Study Drug**

| <b>Category</b>                                                                     | <b>Cefepime/<br/>enmetazobactam<br/>(N=516)<br/>n (%)</b> | <b>Piperacillin/<br/>tazobactam<br/>(N=518)<br/>n (%)</b> |
|-------------------------------------------------------------------------------------|-----------------------------------------------------------|-----------------------------------------------------------|
| Patients with any adverse event                                                     | 277 (53.7)                                                | 242 (46.7)                                                |
| Patients with adverse event                                                         |                                                           |                                                           |
| Any treatment-emergent adverse event                                                | 258 (50.0)                                                | 228 (44.0)                                                |
| Drug-related treatment-emergent adverse event                                       | 102 (19.8)                                                | 75 (14.5)                                                 |
| Patients with treatment-emergent adverse event                                      |                                                           |                                                           |
| Mild (CTCAE Grade 1)                                                                | 174 (33.7)                                                | 153 (29.5)                                                |
| Moderate (CTCAE Grade 2)                                                            | 58 (11.2)                                                 | 49 (9.5)                                                  |
| Severe (CTCAE Grade 3)                                                              | 20 (3.9)                                                  | 22 (4.2)                                                  |
| Life-threatening (CTCAE Grade 4)                                                    | 3 (0.6)                                                   | 1 (0.2)                                                   |
| Death (CTCAE Grade 5)                                                               | 3 (0.6)                                                   | 3 (0.6)                                                   |
| Drug-related treatment-emergent adverse event                                       |                                                           |                                                           |
| Mild (CTCAE Grade 1)                                                                | 74 (14.3)                                                 | 54 (10.4)                                                 |
| Moderate (CTCAE Grade 2)                                                            | 20 (3.9)                                                  | 16 (3.1)                                                  |
| Severe (CTCAE Grade 3)                                                              | 8 (1.6)                                                   | 5 (1.0)                                                   |
| Life-threatening (CTCAE Grade 4)                                                    | 0 (0.0)                                                   | 0 (0.0)                                                   |
| Death (CTCAE Grade 5)                                                               | 0 (0.0)                                                   | 0 (0.0)                                                   |
| Patients with death                                                                 | 3 (0.6)                                                   | 3 (0.6)                                                   |
| Patients with serious adverse event                                                 |                                                           |                                                           |
| Any serious adverse event                                                           | 22 (4.3)                                                  | 19 (3.7)                                                  |
| Treatment-emergent serious adverse event                                            | 22 (4.3)                                                  | 19 (3.7)                                                  |
| Drug-related treatment-emergent serious adverse event                               | 1 (0.2)                                                   | 3 (0.6)                                                   |
| Patients with discontinuation of study drug due to treatment-emergent adverse event |                                                           |                                                           |
| Any treatment-emergent adverse event                                                | 9 (1.7)                                                   | 4 (0.8)                                                   |
| Drug-related treatment-emergent adverse event                                       | 5 (1.0)                                                   | 2 (0.4)                                                   |

Abbreviations: CTCAE, common terminology criteria for adverse events



**eTable 7. Listing of Adverse Events Leading to Discontinuation of Study Drug in All Patients Receiving at Least One Dose of Study Drug**

| Treatment/<br>Patient number                                                                                                                                                                                                       | Adverse Event <sup>a</sup><br>(Preferred Term)   | Severity | Related to<br>Study Drug | Outcome |
|------------------------------------------------------------------------------------------------------------------------------------------------------------------------------------------------------------------------------------|--------------------------------------------------|----------|--------------------------|---------|
| Cefepime/enmetazobactam                                                                                                                                                                                                            |                                                  |          |                          |         |
| 325-007                                                                                                                                                                                                                            | Urinary retention                                | Grade 3  | Yes                      | RD      |
|                                                                                                                                                                                                                                    | Abdominal pain                                   | Grade 3  | Yes                      | RD      |
| 401-002                                                                                                                                                                                                                            | Bacterial infection                              | Grade 1  | No                       | RD      |
| 406-003                                                                                                                                                                                                                            | Pneumonia                                        | Grade 2  | No                       | RD      |
|                                                                                                                                                                                                                                    | Transaminases increased                          | Grade 3  | Yes                      | RD      |
| 425-020                                                                                                                                                                                                                            | Insomnia                                         | Grade 2  | No                       | RD      |
| 521-003                                                                                                                                                                                                                            | Urinary tract infection                          | Grade 2  | No                       | RD      |
| 620-001                                                                                                                                                                                                                            | Nausea                                           | Grade 3  | Yes                      | RD      |
|                                                                                                                                                                                                                                    | Eructation                                       | Grade 2  | Yes                      | RD      |
|                                                                                                                                                                                                                                    | Restlessness                                     | Grade 3  | Yes                      | RD      |
| 701-004                                                                                                                                                                                                                            | Headache                                         | Grade 3  | Yes                      | RD      |
| 922-013                                                                                                                                                                                                                            | Pyelonephritis acute                             | Grade 3  | No                       | RD      |
| 923-009                                                                                                                                                                                                                            | Dermatitis allergic                              | Grade 3  | Yes                      | RD      |
| Piperacillin/tazobactam                                                                                                                                                                                                            |                                                  |          |                          |         |
| 400-016                                                                                                                                                                                                                            | Lung carcinoma cell type<br>unspecific recurrent | Grade 5  | No                       | Fatal   |
| 620-002                                                                                                                                                                                                                            | Septic shock                                     | Grade 5  | No                       | Fatal   |
| 924-016                                                                                                                                                                                                                            | Abdominal pain upper                             | Grade 2  | Yes                      | RD      |
|                                                                                                                                                                                                                                    | Vomiting                                         | Grade 2  | Yes                      | RD      |
|                                                                                                                                                                                                                                    | Diarrhea                                         | Grade 2  | Yes                      | RD      |
| 930-032                                                                                                                                                                                                                            | Hypersensitivity                                 | Grade 2  | Yes                      | RD      |
| Abbreviations: RD, Recovered/Resolved.<br><sup>a</sup> Adverse events were distinguished as occurring on or after the first dose of study drug. Coding was based on the Medical Dictionary for Regulatory Activities Version 21.0. |                                                  |          |                          |         |

## eBox. Exclusion and Inclusion criteria Used Among 1107 Patients Assessed for Study Eligibility

### Inclusion criteria not met by assessed patients:

- Baseline urine culture specimen
- Pyuria
- Expectation that any implanted urinary instrumentation will be surgically removed or replaced
- Expectation that the patient's complicated urinary tract infection (UTI) or acute pyelonephritis will require hospitalization and initial treatment
- Female patient who is no longer of childbearing potential must meet 1 of the described criteria
- Clinical signs and/or symptoms of complicated UTI or acute pyelonephritis

### Exclusion criteria met by assessed patients:

- QT interval corrected using the Fridericia formula  $>450$  ms
- Impairment of kidney function with estimated glomerular filtration rate  $<30$  mL/min/1.73 m<sup>2</sup>
- At screening, aspartate aminotransferase, alanine aminotransferase, alkaline phosphatase, or total bilirubin level  $>3$  times the upper limit of normal, or current clinically significant liver disease
- Any condition or circumstance that would compromise the safety of the patient or the quality of data
- Unable or unwilling, in the judgment of the investigator, to comply with the protocol
- At screening, platelet count  $<50 \times 10^3/\mu\text{L}$ , absolute neutrophil count  $<1000/\mu\text{L}$ , or hemoglobin level  $<8$  g/dL
- Immunocompromising condition or immunosuppressive therapy
- Known urine culture with gram-positive primary pathogen or suspected gram-positive pathogen
- Likely to require the use of an antibiotic for complicated UTI or acute pyelonephritis prophylaxis
- Receipt of potentially effective systemic antibacterial drug therapy for a continuous duration  $>24$  hours
- Presence of disease or condition that may confound the assessment of efficacy
- Complete, permanent obstruction of the urinary tract
- History of significant hypersensitivity or allergic reaction
- Patient considered unlikely to survive the approximately 6-week study period
- Urinary tract surgery within 7 days prior to randomization or urinary tract surgery planned
- Weight  $>180$  kg
- Any rapidly progressing disease or immediately life-threatening illness
- Complicated UTI known at study entry to be caused by pathogens resistant to the study antibiotics
- Intractable UTI at baseline
- Pregnant or expecting to conceive, breastfeeding, or plans to breastfeed
