# Supplementary material
Source: PubMed Central journal article supplement (PMC9533186)
Supplement: jama-e2217034-s004.pdf [file jama-e2217034-s004.pdf]

## Data Sharing Statement

Kaye. Effect of Cefepime/Enmetazobactam vs Piperacillin/Tazobactam on Clinical Cure and Microbiological Eradication in Patients With Complicated Urinary Tract Infection or Acute Pyelonephritis. *JAMA*. Published October 04, 2022. doi:10.1001/jama.2022.17034

### Data

**Data available:** Yes

**Data types:** Deidentified participant data

**How to access data:** [https://clinicaltrials.gov/ct2/history/NCT03687255?V\\_5&embedded=true](https://clinicaltrials.gov/ct2/history/NCT03687255?V_5&embedded=true)

**When available:** With publication

### Supporting Documents

**Document types:** None

### Additional Information

**Who can access the data:** researchers whose proposed use of the data has been approved

**Types of analyses:** for a specified purpose

**Mechanisms of data availability:** with a signed data access agreement
